# Supplementary material
Source: PubMed Central journal article supplement (PMC4188757)
Supplement: NIHMS618021-supplement-02.pdf [file NIHMS618021-supplement-02.pdf]

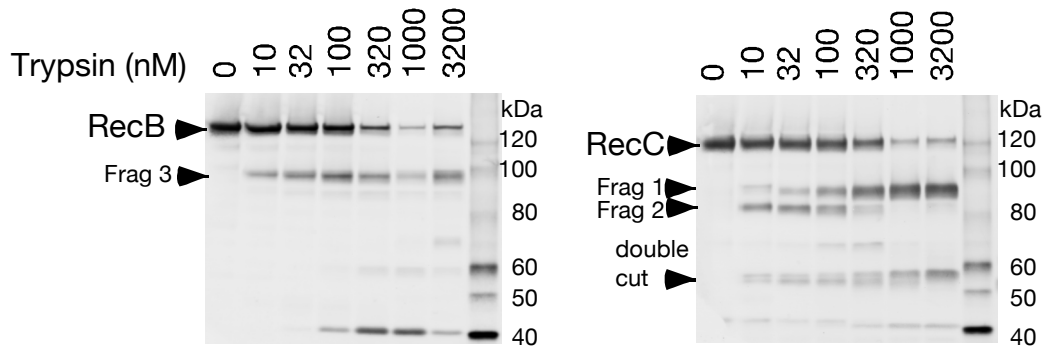

Figure S1

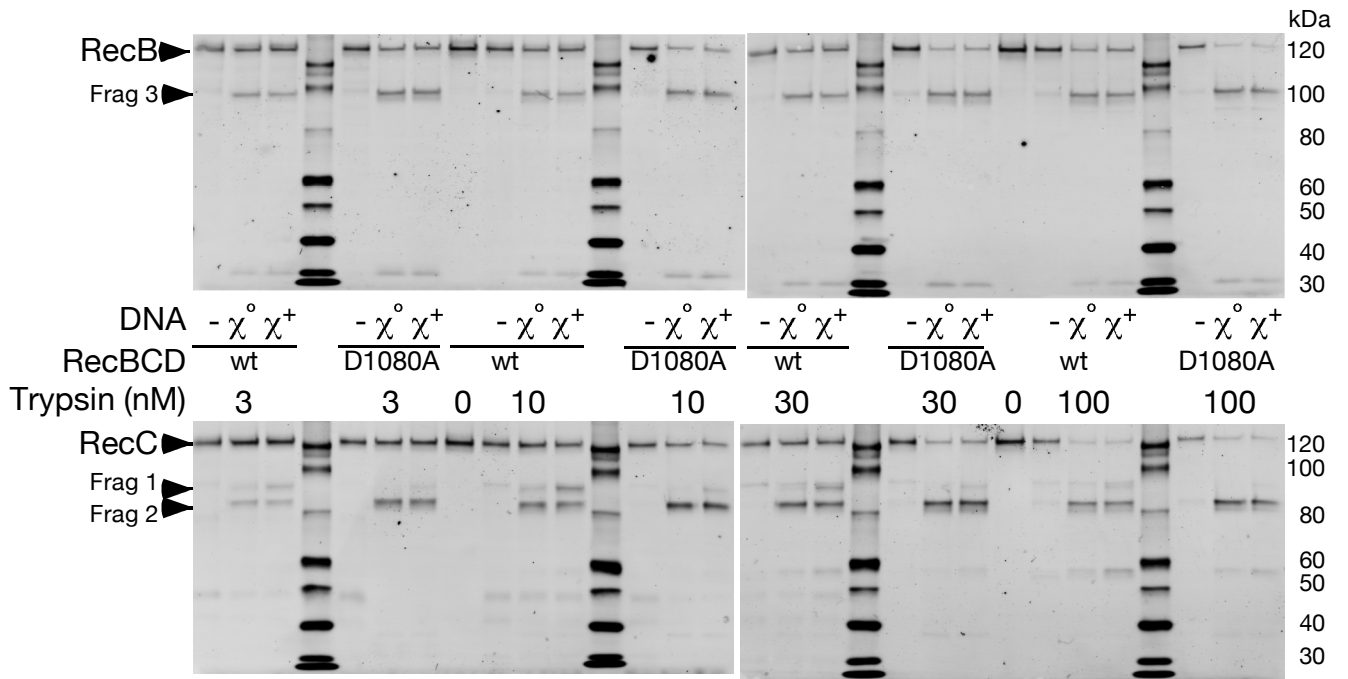

Figure S2

# Figure S3

**a**

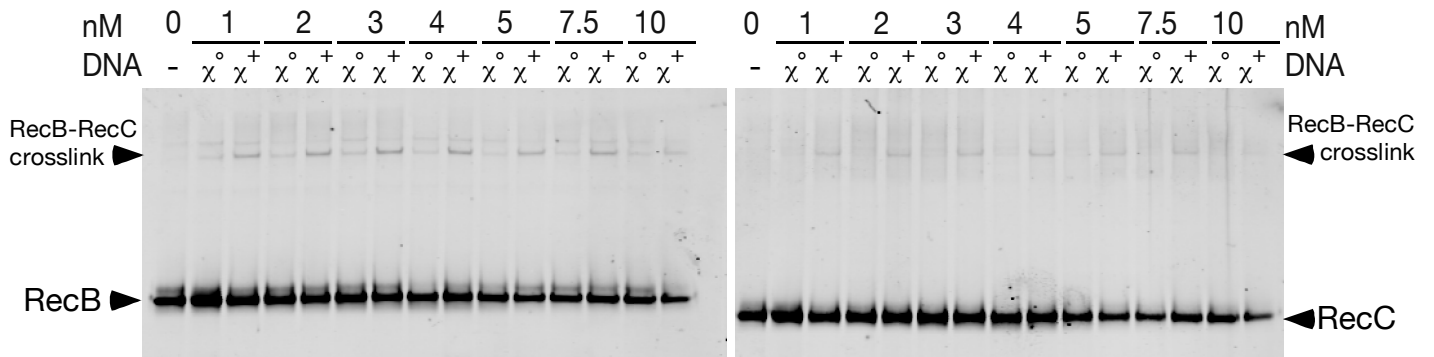

**b**

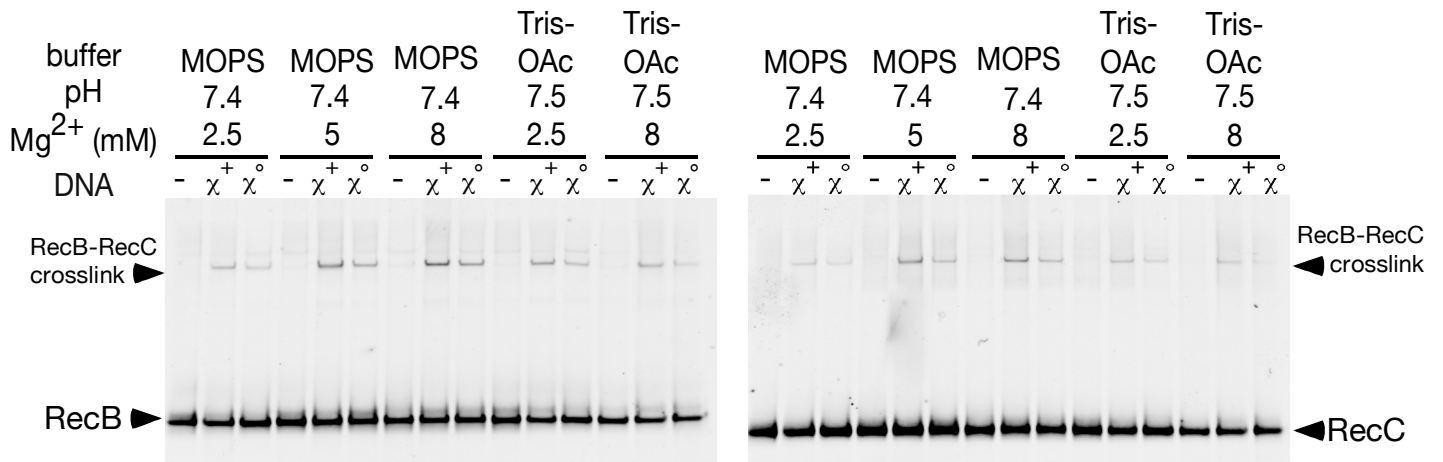

# Figure S4a

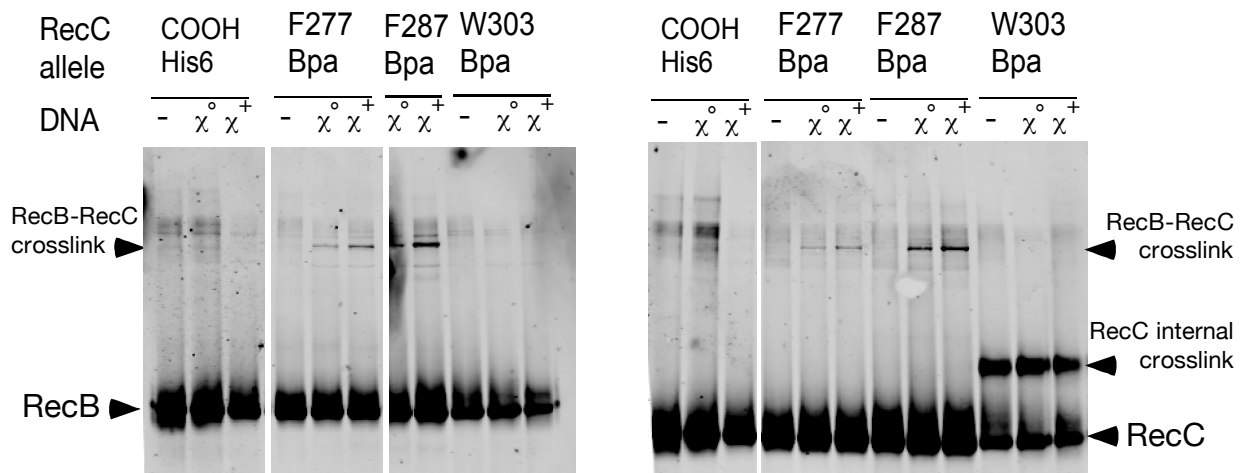

# Figure S4b

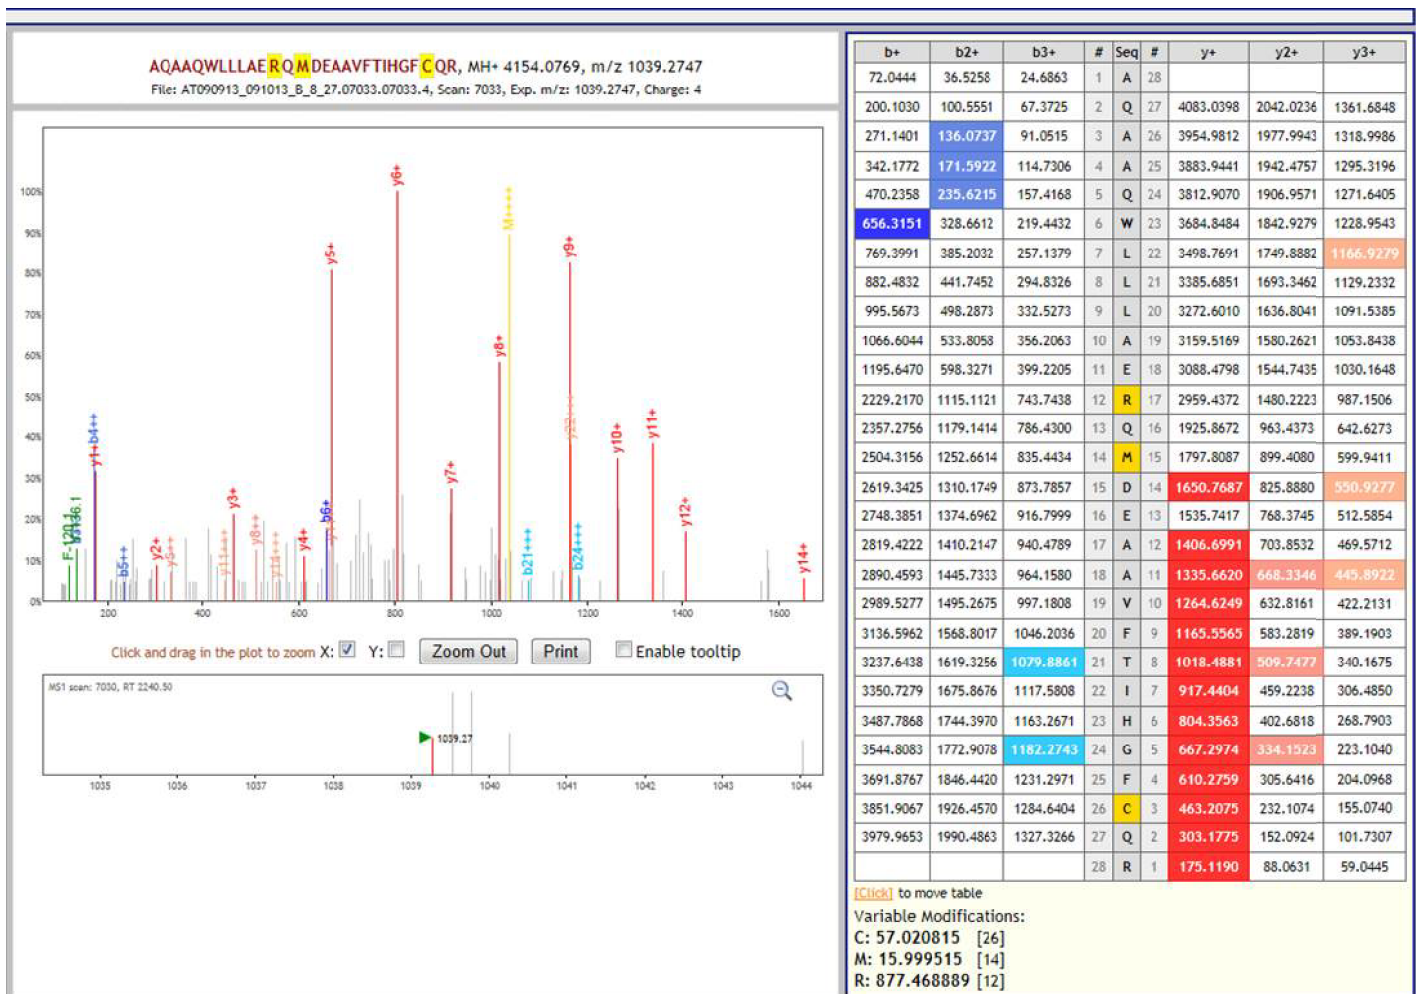

A

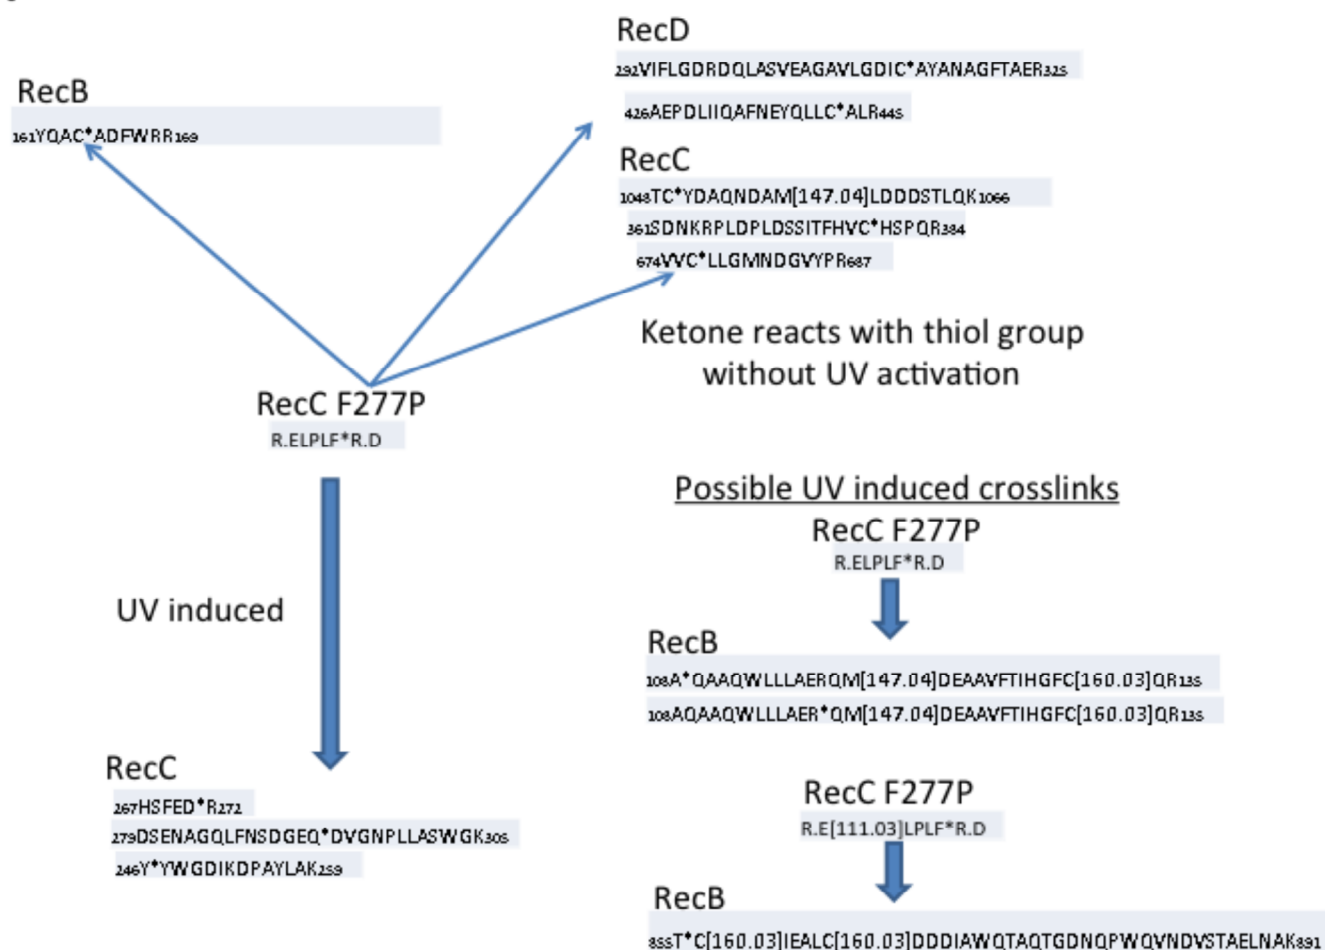

B

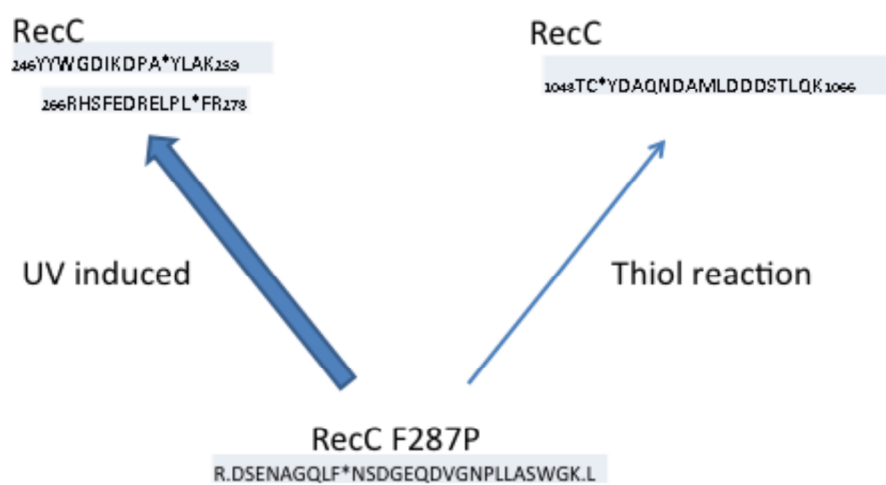



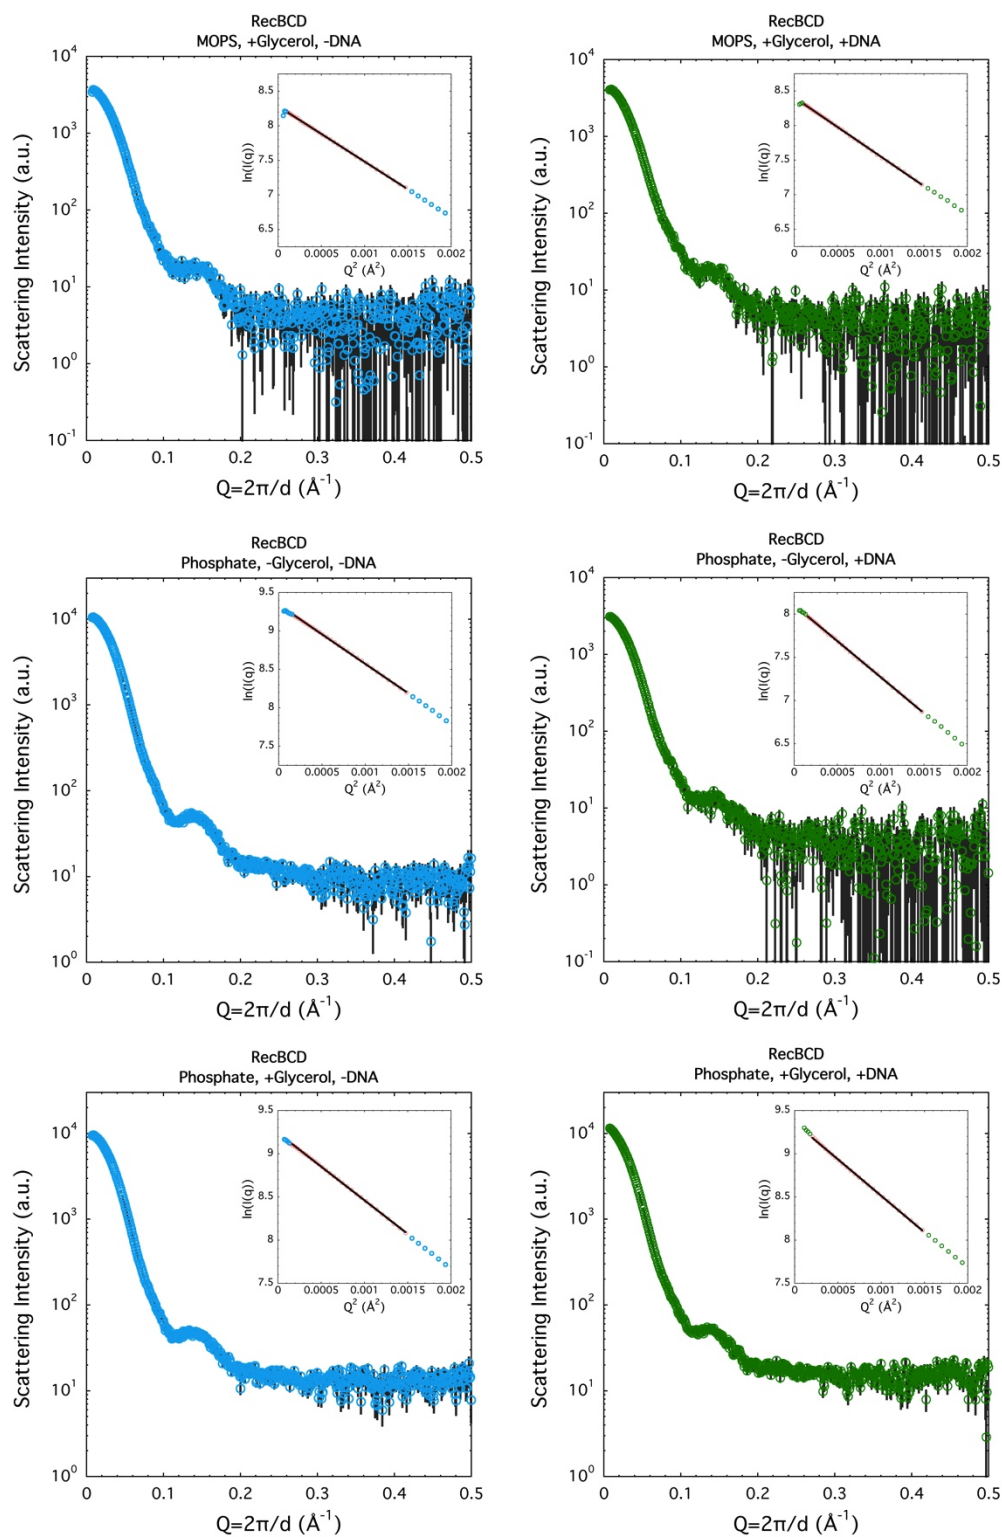

Supplementary Figure S7. SAXS patterns and Guinier plots (inset) for RecBCD in MOPS or K- $\text{PO}_4$  buffer, with or without glycerol and with or without hairpin DNA.

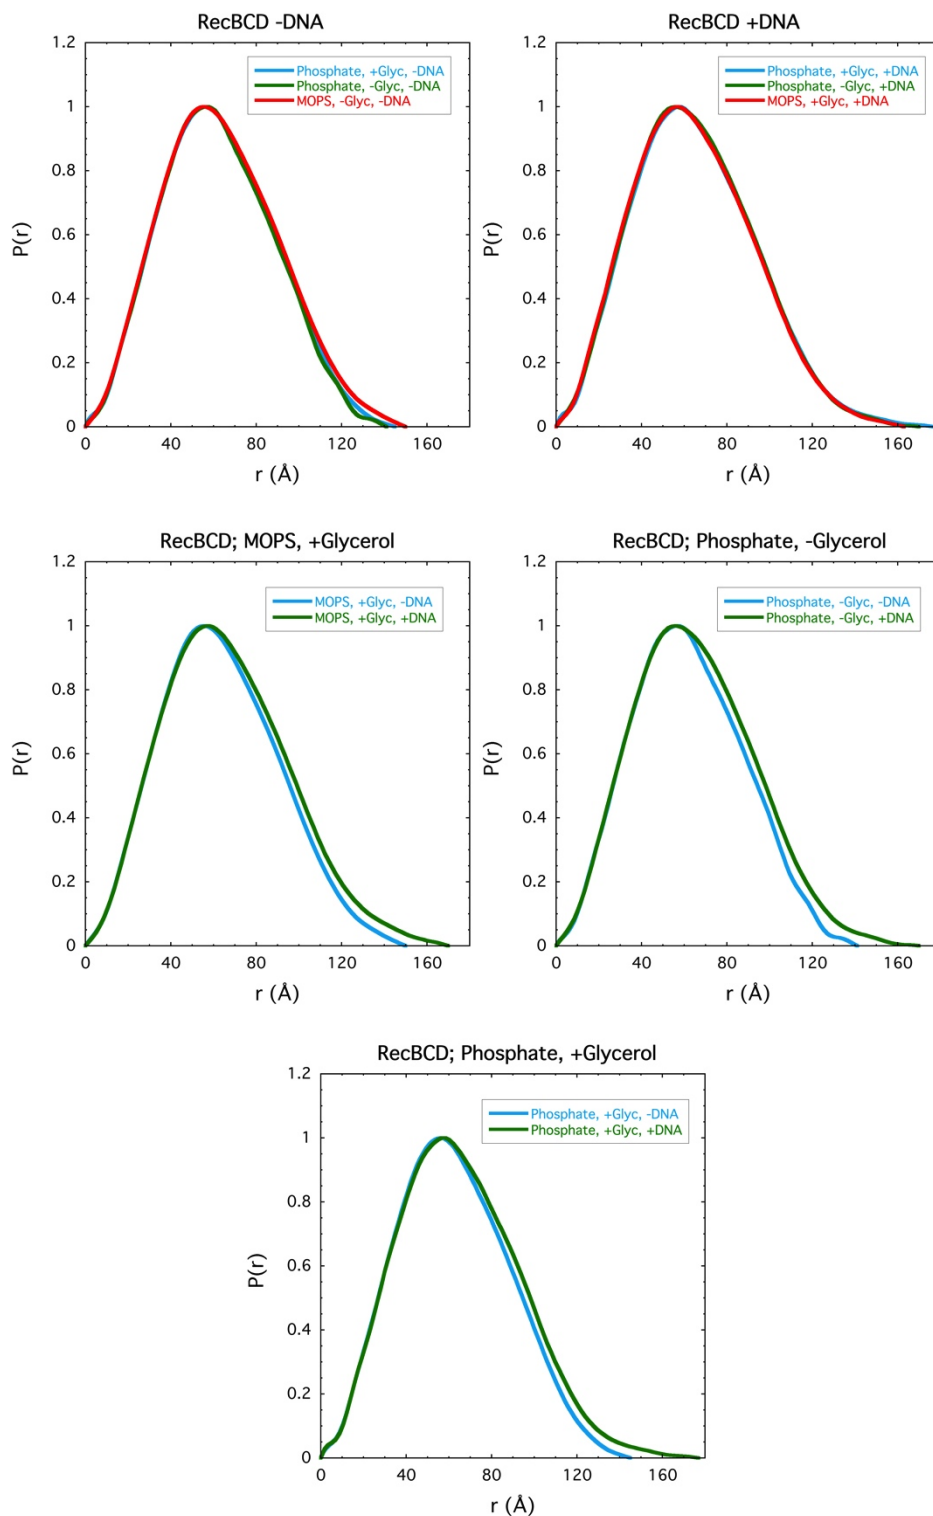

Supplementary Figure S8. Pairwise distance distribution plots,  $P(r)$ , obtained from SAXS patterns for RecBCD in MOPS or K- $\text{PO}_4$  buffer, with or without glycerol and with or without hairpin DNA.

MOPS +Glycerol -DNA

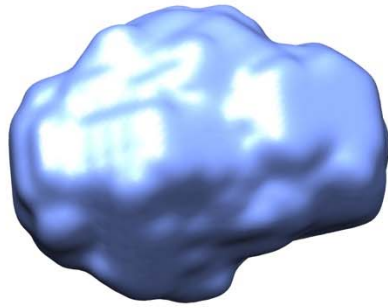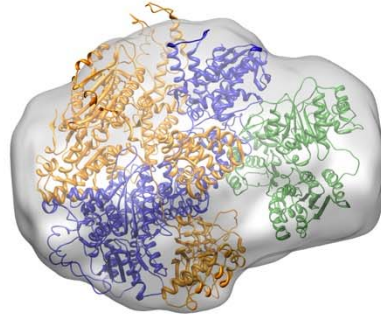

PO4 -Glycerol -DNA

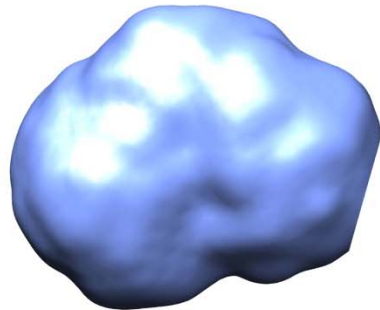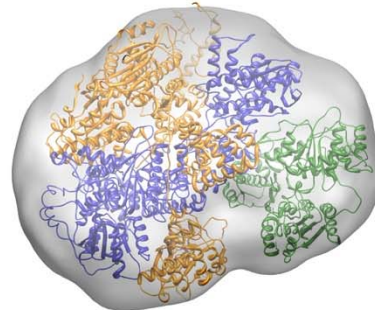

PO4 +Glycerol -DNA

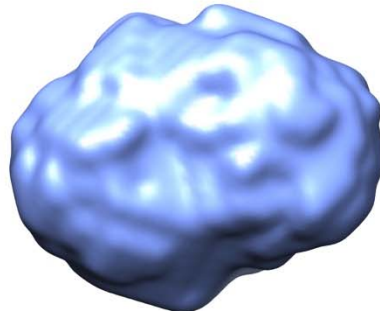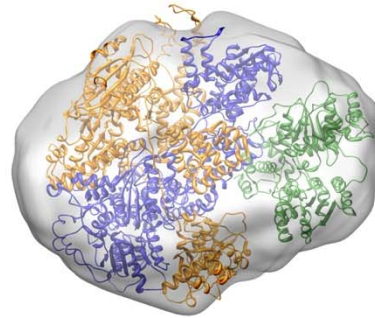

Supplementary Figure S9. SAXS reconstructions for RecBCD in MOPS or K-PO<sub>4</sub> buffer, with or without glycerol and without hairpin DNA. Images on the right have the crystal structure (PDB 3K70), minus the DNA, docked using the automated fit-in-map function in Chimera.



MOPS +Glycerol +DNA

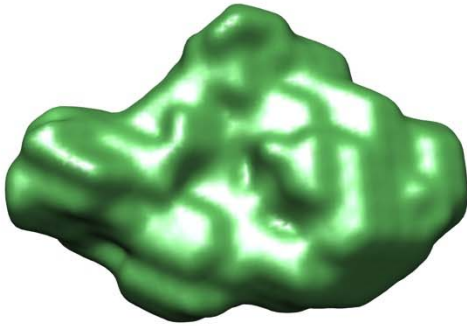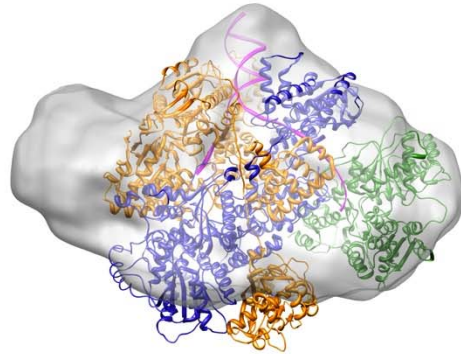

PO4 -Glycerol +DNA

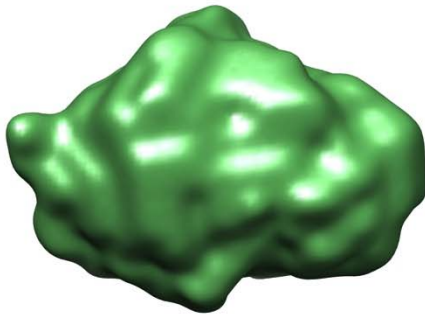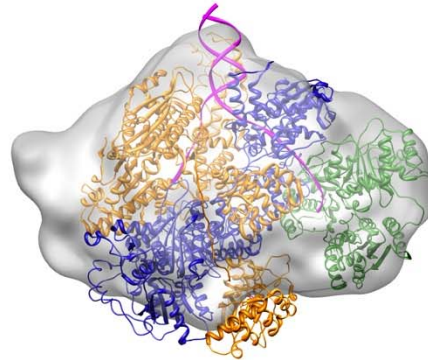

PO4 +Glycerol +DNA

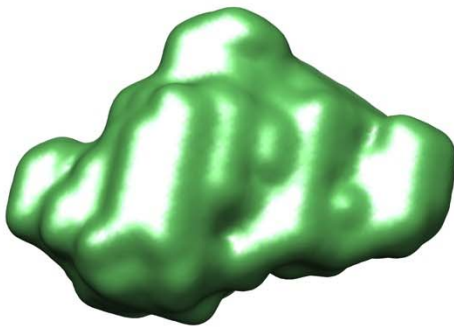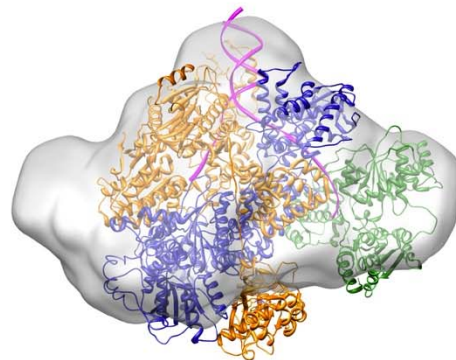

Supplementary Figure S10. SAXS reconstructions for RecBCD in MOPS or K-PO<sub>4</sub> buffer, with or without glycerol and with hairpin DNA bound. Images on the right have the crystal structure (PDB 3K70) docked using the automated fit-in-map function in Chimera.

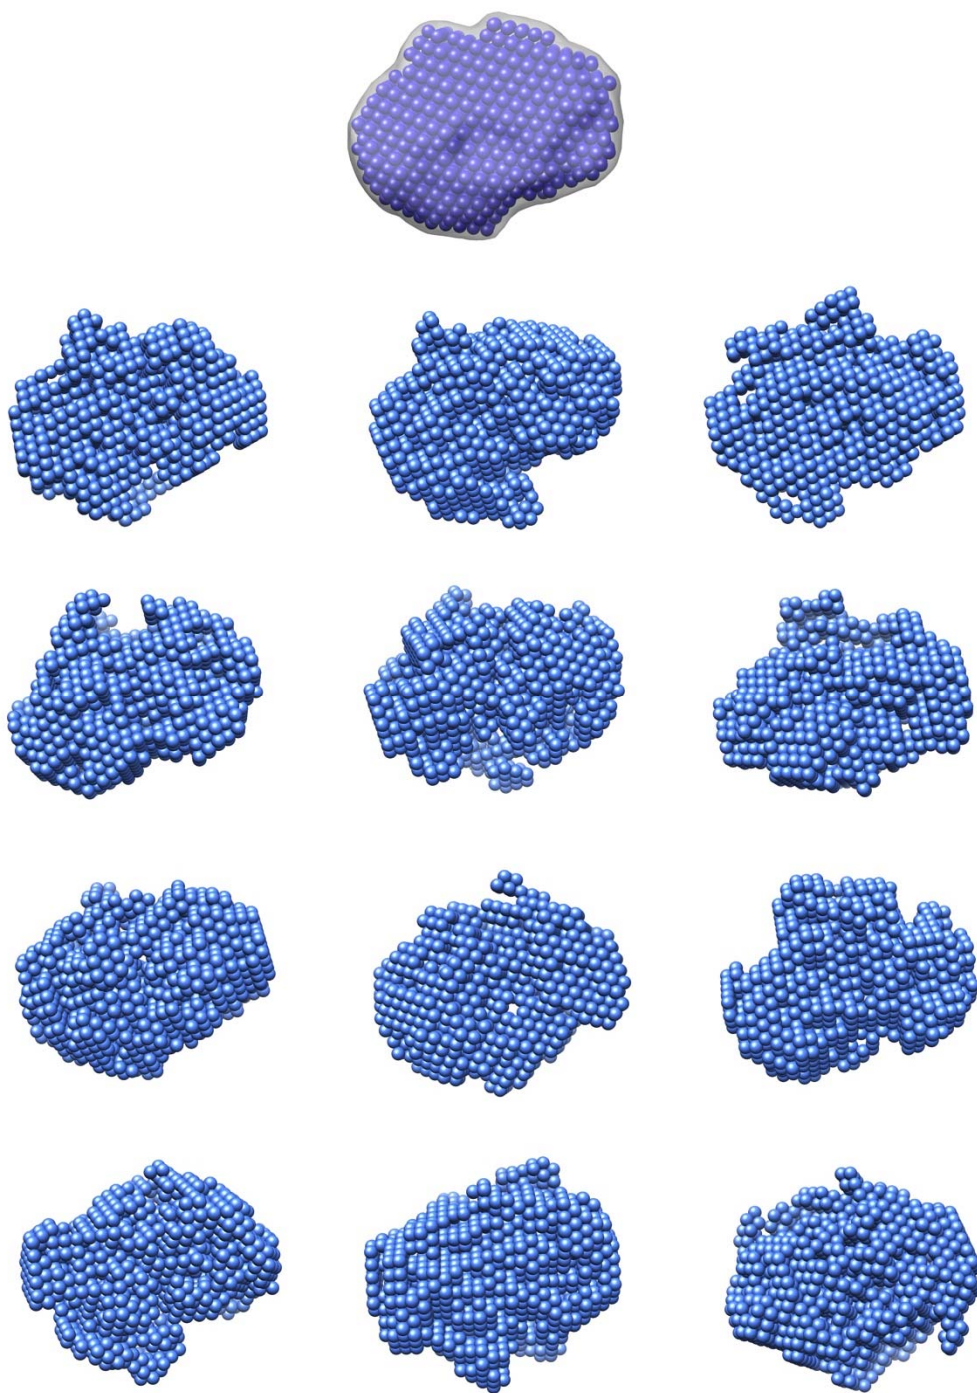

Supplementary Figure S11. Individual DAMMIN models and averaged model (top) for RecBCD in K-PO<sub>4</sub> buffer with glycerol and without hairpin DNA. Shown are the 12 DAMMIN models generated and used to produce the final model.

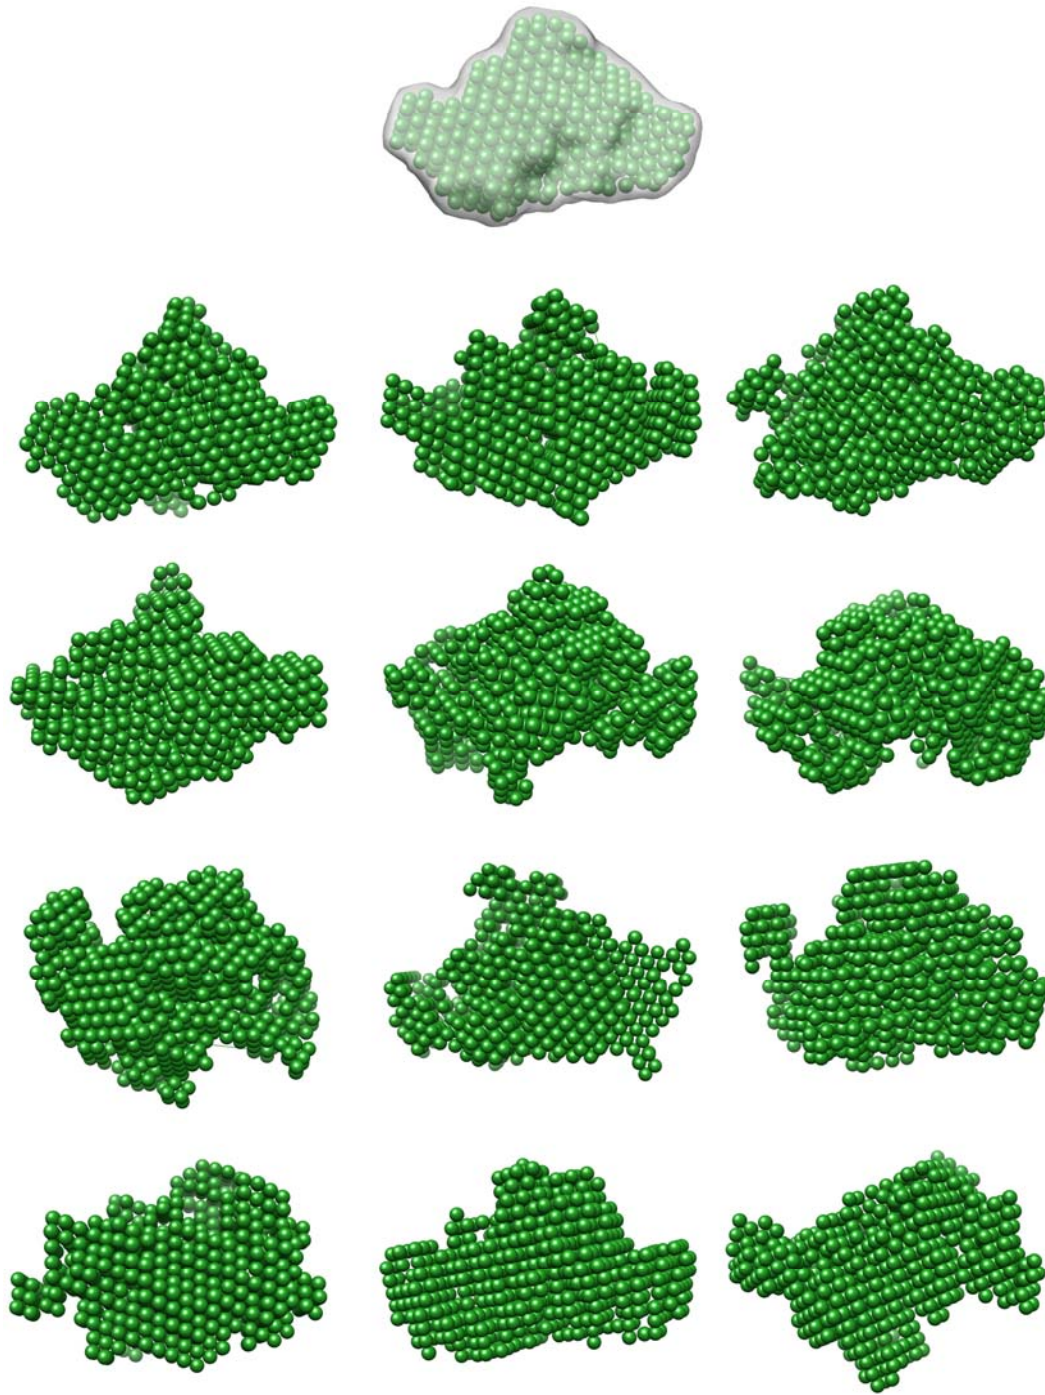

Supplementary Figure S12. Individual DAMMIN models and averaged model (top) for RecBCD in K-PO<sub>4</sub> buffer with glycerol and with hairpin DNA bound. Shown are the 12 DAMMIN models generated and used to produce the final model.

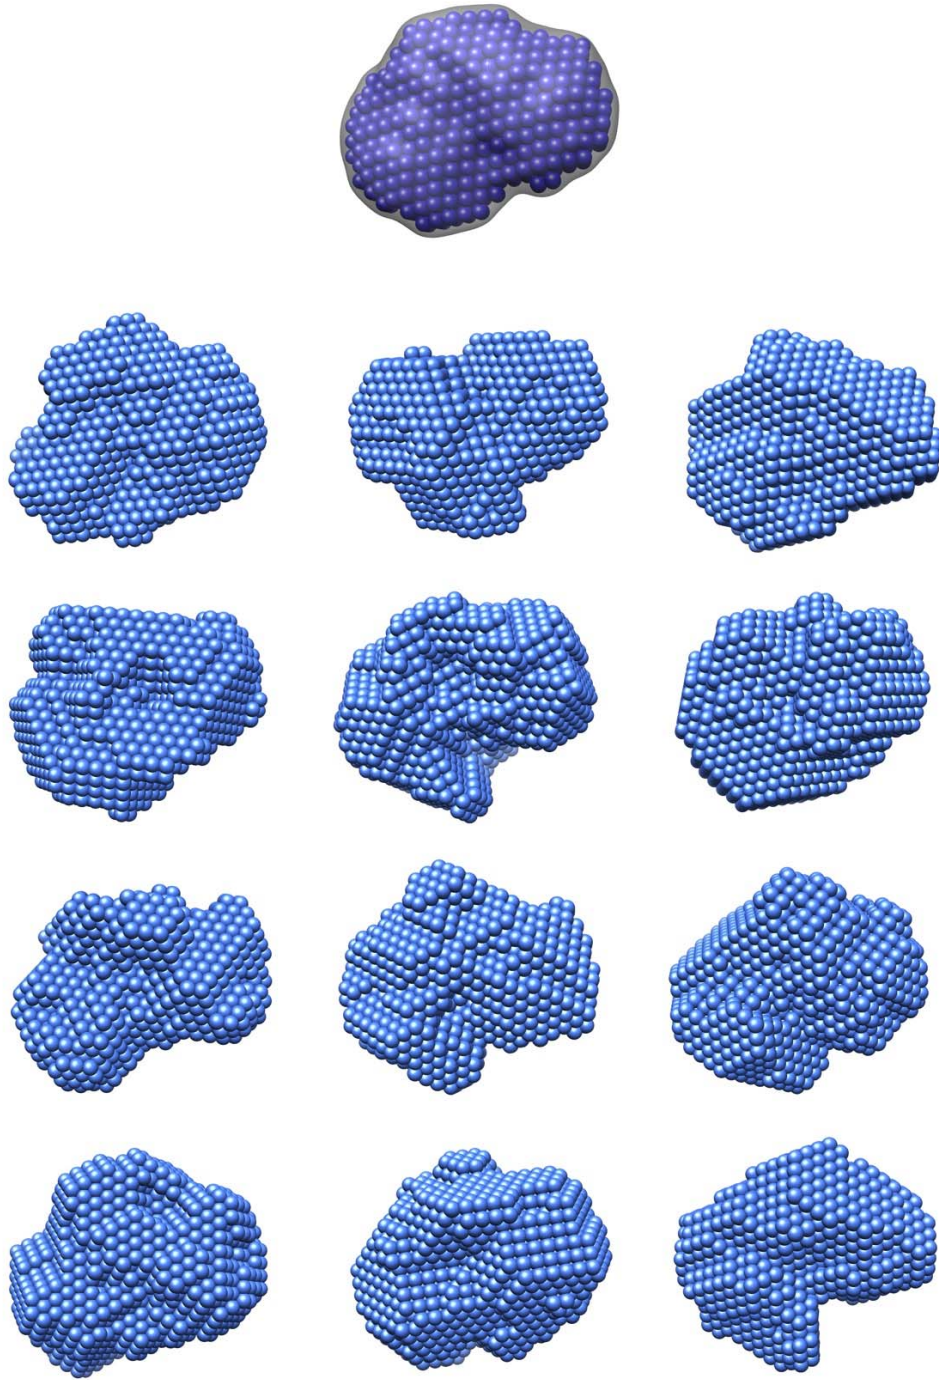

Supplementary Figure S13. Individual DAMMIN models and averaged model (top) for RecBCD in K-PO<sub>4</sub> buffer without glycerol and without hairpin DNA. Shown are the 12 DAMMIN models generated and used to produce the final model.

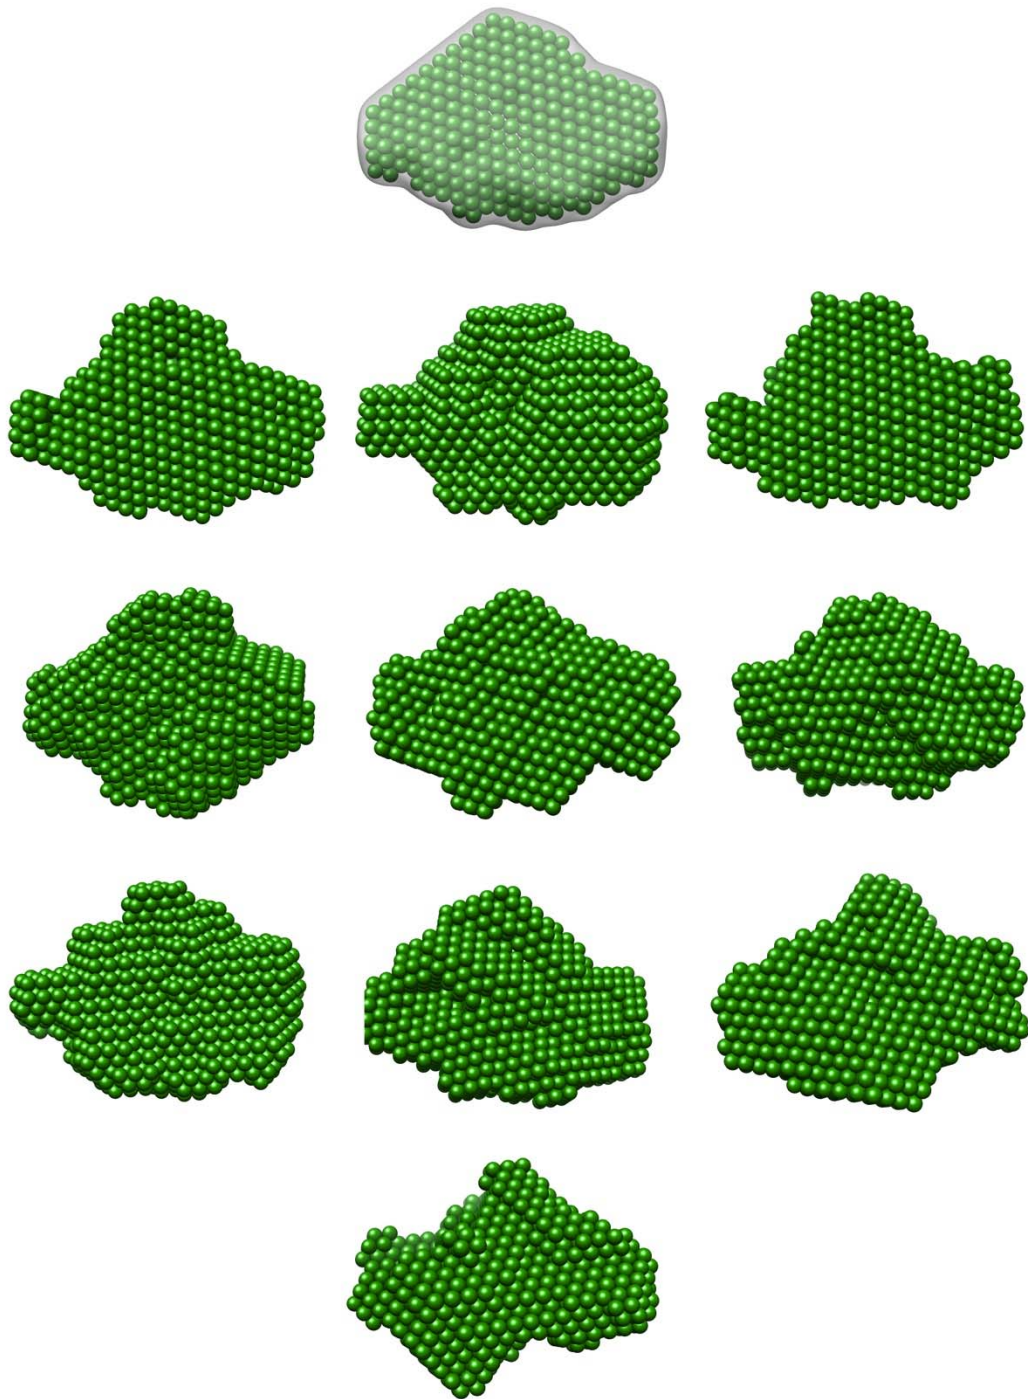

Supplementary Figure S14. Individual DAMMIN models and averaged model (top) for RecBCD in K-PO<sub>4</sub> buffer without glycerol and with hairpin DNA bound. Only the ten models, of the 12 generated, that fall within the  $\Delta\text{NSD} < 2$ (standard deviation) relative to the average NSD among the cohort were used to produce the final model.

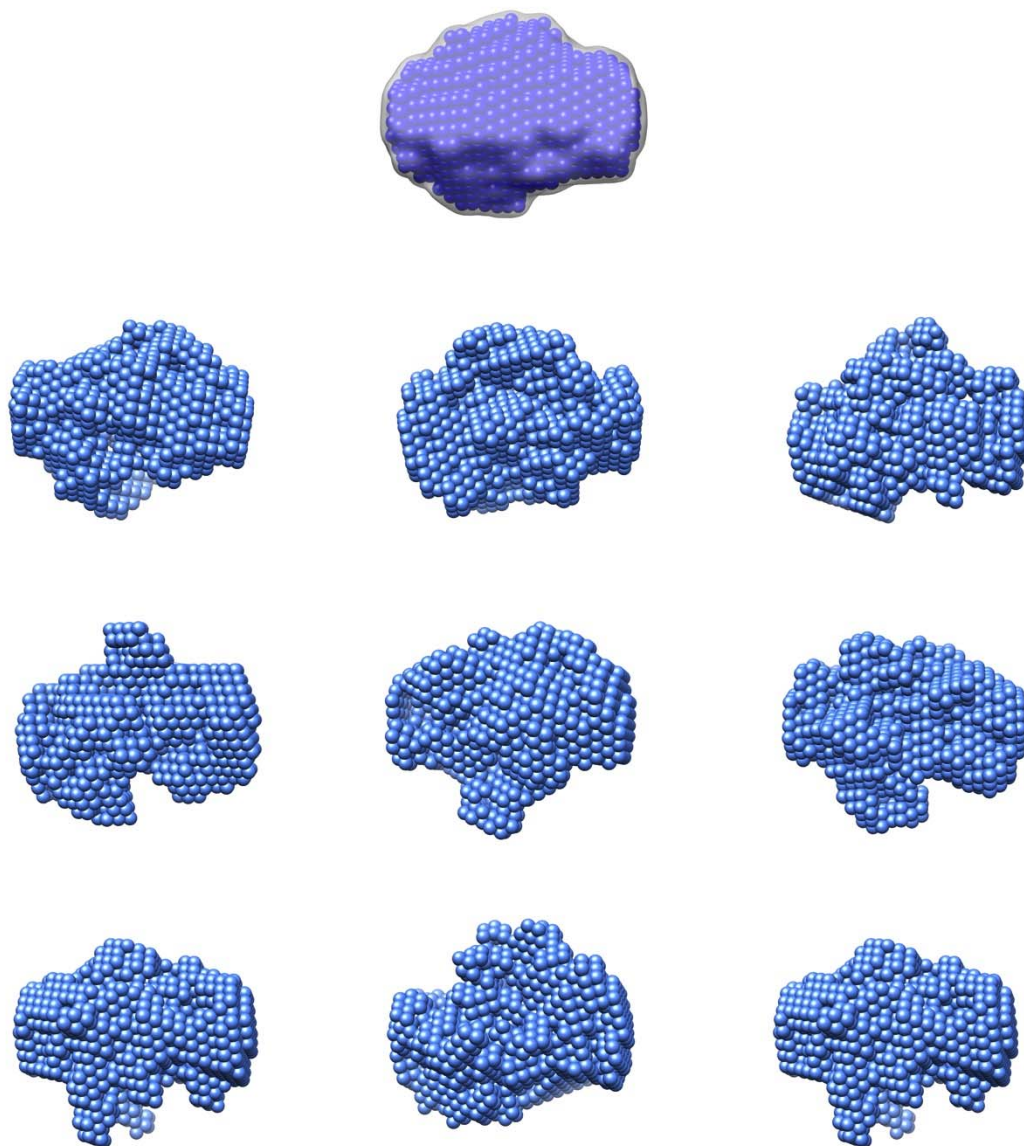

Supplementary Figure S15. Individual DAMMIN models and averaged model (top) for RecBCD in MOPS buffer with glycerol and without hairpin DNA. Only the nine models, of the 12 generated, that fall within the  $\Delta\text{NSD} < 2$ (standard deviation) relative to the average NSD among the cohort were used to produce the final model.

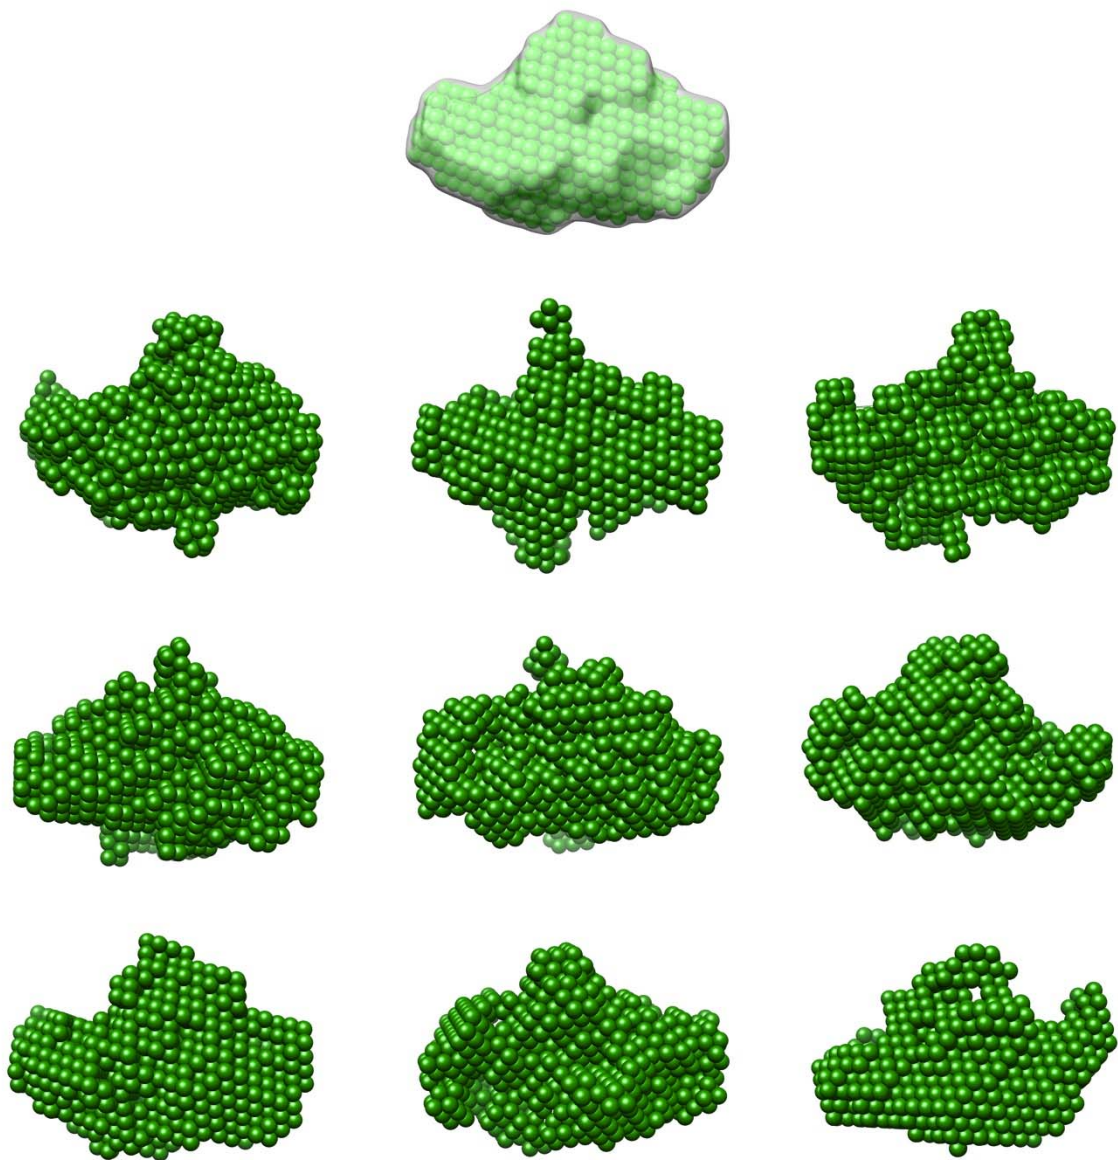

Supplementary Figure S16. Individual DAMMIN models and averaged model (top) for RecBCD in MOPS buffer with glycerol and with hairpin DNA bound. Only the nine models, of the 12 generated, that fall within the  $\Delta\text{NSD} < 2$ (standard deviation) relative to the average NSD among the cohort were used to produce the final model.
